# Supplementary material for: Carvacrol Essential Oil: A Natural Antibiotic against Zoonotic Multidrug-Resistant Staphylococcus Species Isolated from Diseased Livestock and Humans
Source: MDPI journal article supplement (doi:10.3390/antibiotics10111328), 2021-10-30
Supplement: s1 [file s1]

## Supplementary Material

# Carvacrol Essential Oil: A Natural Antibiotic against Zoonotic Multidrug-Resistant *Staphylococcus* Species Isolated from Diseased Livestock and Humans

Ahmed H. Abed <sup>1,\*</sup>, Esraa F. Hegazy <sup>1</sup>, Sherif A. Omar <sup>2</sup>, Rehab M. Abd El-Baky <sup>3,4</sup>, Ahmed A. El-Beih <sup>5,\*</sup>, Ahmed Al-Emam <sup>6,7</sup>, Ahmed M.S. Menshawy <sup>8</sup> and Eman Khalifa <sup>9</sup>

<sup>1</sup> Bacteriology, Mycology and Immunology Department, Faculty of Veterinary Medicine, Beni-Suef University, Beni-Suef 62511, Egypt; esraahegazysayed@gmail.com

<sup>2</sup> Microbiology Department, Faculty of Veterinary Medicine, Cairo University, Cairo 12211, Egypt; sherif.marouf@cu.edu.eg

<sup>3</sup> Department of Microbiology and Immunology, Faculty of Pharmacy, Deraya University, Minia 11566, Egypt; rehab.mahmoud@mu.edu.eg

<sup>4</sup> Department of Microbiology and Immunology, Faculty of Pharmacy, Minia University, Minia 61519, Egypt

<sup>5</sup> Chemistry of Natural & Microbial Products Department, National Research Centre, Dokki, Giza 12622, Egypt

<sup>6</sup> Department of Pathology, College of Medicine, King Khalid University, Abha 61421, Saudi Arabia; amalemam@kku.edu.sa

<sup>7</sup> Department of Forensic Medicine and Clinical Toxicology, Faculty of Medicine, Mansoura University, Mansoura 35516, Egypt;

<sup>8</sup> Department of Veterinary Medicine (Infectious Diseases), Faculty of Veterinary Medicine, Beni-Suef University, Beni-Suef 62511, Egypt; elmenshawy81@yahoo.com or ahmed.elmenshawy@vet.bsue.edu.eg

<sup>9</sup> Department of Microbiology, Faculty of Veterinary Medicine, Matrouh University, Matrouh 51511, Egypt; khalifa.eman@alexu.edu.eg

\* Correspondence: ahmed.moawad@vet.bsue.edu.eg (A.H.A.); aa.el-beih@nrc.sci.eg (A.A.E.-B.); Tel.: +20-1100878858 (A.H.A.); Tel.: +20-1112914327 (A.A.E.-B.)

**Table S1.** Types of haemolysis and biofilm formation produced by different *Staphylococcus* spp. isolated from different sources.

| Species                | Source of Isolates | No. of Tested Isolates | Type of Haemolysis on Sheep Blood Agar |      |         |      |          |      |        |      | Biofilm Formation |      |                |      |
|------------------------|--------------------|------------------------|----------------------------------------|------|---------|------|----------|------|--------|------|-------------------|------|----------------|------|
|                        |                    |                        | $\alpha$                               |      | $\beta$ |      | $\gamma$ |      | Strong |      | Intermediate      |      | Total Positive |      |
|                        |                    |                        | No.                                    | %    | No.     | %    | No.      | %    | No.    | %    | No.               | %    | No.            | %    |
| <i>S. aureus</i>       | Milk               | 35                     | 0                                      | 0    | 24      | 68.6 | 11       | 31.4 | 14     | 40   | 5                 | 14.3 | 19             | 54.3 |
|                        | Sheep              | 7                      | 0                                      | 0    | 5       | 71.4 | 2        | 28.6 | 4      | 57.1 | 0                 | 0    | 4              | 57.1 |
|                        | Human              | 24                     | 0                                      | 0    | 20      | 83.3 | 4        | 16.7 | 9      | 37.5 | 2                 | 8.3  | 11             | 45.8 |
| <i>S. schleiferi</i>   | Milk               | 27                     | 16                                     | 59.3 | 5       | 18.5 | 6        | 22.2 | 6      | 22.2 | 5                 | 18.5 | 11             | 40.7 |
|                        | Sheep              | 2                      | 2                                      | 100  | 0       | 0    | 0        | 0    | 0      | 0    | 1                 | 50   | 1              | 50   |
|                        | Human              | 10                     | 5                                      | 50   | 2       | 20   | 3        | 30   | 3      | 30   | 1                 | 10   | 4              | 40   |
| <i>S. intermedius</i>  | Milk               | 8                      | 5                                      | 62.5 | 3       | 37.5 | 0        | 0    | 3      | 3.5  | 1                 | 12.5 | 4              | 50   |
|                        | Sheep              | 2                      | 2                                      | 100  | 0       | 0    | 0        | 0    | 0      | 0    | 0                 | 0    | 0              | 0    |
|                        | Human              | 9                      | 6                                      | 66.7 | 3       | 33.3 | 0        | 0    | 3      | 33.3 | 1                 | 11.1 | 4              | 44.4 |
| <i>S. xylosus</i>      | Milk               | 2                      | 1                                      | 50   | 0       | 0    | 1        | 50   | 1      | 50   | 1                 | 50   | 2              | 100  |
|                        | Sheep              | 1                      | 0                                      | 0    | 1       | 100  | 0        | 0    | 0      | 0    | 0                 | 0    | 0              | 0    |
|                        | Human              | 15                     | 3                                      | 20   | 5       | 33.3 | 7        | 46.7 | 5      | 33.3 | 2                 | 13.3 | 7              | 46.7 |
| <i>S. haemolyticus</i> | Milk               | 2                      | 0                                      | 0    | 2       | 100  | 0        | 0    | 1      | 50   | 0                 | 0    | 1              | 50   |
|                        | Human              | 5                      | 0                                      | 0    | 5       | 100  | 0        | 0    | 3      | 60   | 0                 | 0    | 3              | 60   |
| <i>S. epidermidis</i>  | Milk               | 1                      | 0                                      | 0    | 1       | 100  | 0        | 0    | 0      | 0    | 0                 | 0    | 0              | 0    |
|                        | Sheep              | 1                      | 0                                      | 0    | 1       | 100  | 0        | 0    | 0      | 0    | 0                 | 0    | 0              | 0    |
|                        | Human              | 1                      | 0                                      | 0    | 1       | 100  | 0        | 0    | 0      | 0    | 1                 | 100  | 1              | 100  |
| <i>S. aureolaris</i>   | Human              | 2                      | 0                                      | 0    | 0       | 0    | 2        | 100  | 0      | 0    | 0                 | 0    | 0              | 0    |
| Total                  | Milk               | 75                     | 22                                     | 29.3 | 35      | 46.7 | 18       | 24   | 25     | 33.3 | 12                | 16   | 37             | 49.3 |
|                        | Sheep              | 13                     | 4                                      | 30.8 | 7       | 53.9 | 2        | 15.3 | 4      | 30.8 | 1                 | 7.7  | 5              | 38.5 |
|                        | Human              | 66                     | 14                                     | 21.1 | 36      | 54.6 | 16       | 24.3 | 23     | 34.8 | 7                 | 10.6 | 30             | 45.5 |
| Overall total          |                    | 154                    | 40                                     | 26   | 78      | 50.6 | 36       | 23.4 | 52     | 33.8 | 20                | 13   | 72             | 46.8 |

?: was calculated according to the corresponding number (No.) of tested isolates.

**Table S2.** Antimicrobial susceptibility of different *Staphylococcus* spp. isolated from cows' milk samples.

| Antimicrobial Disc                   | Disc Content (µg) | <i>S. aureus</i> (n=35) |    |     | <i>S. schleiferi</i> (n=27) |    |     | <i>S. intermedius</i> (n=8) |    |     | <i>S. xylosus</i> (n=2) |   |     | <i>S. haemolyticus</i> (n=2) |     |     | <i>S. epidermidis</i> (n=1) |     |     |
|--------------------------------------|-------------------|-------------------------|----|-----|-----------------------------|----|-----|-----------------------------|----|-----|-------------------------|---|-----|------------------------------|-----|-----|-----------------------------|-----|-----|
|                                      |                   | R                       | I  | S   | R                           | I  | S   | R                           | I  | S   | R                       | I | S   | R                            | I   | S   | R                           | I   | S   |
| <b>Ampicillin</b>                    | <b>10</b>         | 100                     | 0  | 0   | 100                         | 0  | 0   | 100                         | 0  | 0   | 100                     | 0 | 0   | 100                          | 0   | 0   | 100                         | 0   | 0   |
| <b>Cefoxitin</b>                     | <b>30</b>         | 100                     | 0  | 0   | 100                         | 0  | 0   | 100                         | 0  | 0   | 100                     | 0 | 0   | 100                          | 0   | 0   | 100                         | 0   | 0   |
| <b>Vancomycin</b>                    | <b>30</b>         | 69                      | 0  | 31  | 77                          | 0  | 23  | 100                         | 0  | 0   | 50                      | 0 | 50  | 50                           | 0   | 50  | 100                         | 0   | 0   |
| <b>Imipenem</b>                      | <b>10</b>         | 0                       | 0  | 100 | 0                           | 0  | 100 | 0                           | 0  | 100 | 0                       | 0 | 100 | 0                            | 0   | 100 | 0                           | 0   | 100 |
| <b>Amoxicillin-clavulanic acid</b>   | <b>5</b>          | 100                     | 0  | 0   | 100                         | 0  | 0   | 100                         | 0  | 0   | 100                     | 0 | 0   | 100                          | 0   | 0   | 100                         | 0   | 0   |
| <b>Kanamycin</b>                     | <b>30</b>         | 29                      | 57 | 14  | 33                          | 52 | 14  | 25                          | 75 | 0   | 100                     | 0 | 0   | 100                          | 0   | 0   | 0                           | 0   | 100 |
| <b>Clindamycin</b>                   | <b>2</b>          | 86                      | 6  | 8   | 86                          | 7  | 7   | 100                         | 0  | 0   | 100                     | 0 | 0   | 100                          | 0   | 0   | 100                         | 0   | 0   |
| <b>azithromycin</b>                  | <b>15</b>         | 31                      | 23 | 46  | 18                          | 37 | 44  | 25                          | 25 | 50  | 50                      | 0 | 50  | 0                            | 100 | 0   | 0                           | 100 | 0   |
| <b>Cefuroxime</b>                    | <b>30</b>         | 91                      | 6  | 3   | 77                          | 15 | 7   | 100                         | 0  | 0   | 100                     | 0 | 0   | 100                          | 0   | 0   | 010                         | 0   | 0   |
| <b>Chloramphenicol</b>               | <b>30</b>         | 74                      | 6  | 20  | 74                          | 7  | 18  | 100                         | 0  | 0   | 50                      | 0 | 50  | 50                           | 0   | 50  | 100                         | 0   | 0   |
| <b>Sulfamethoxazole-trimethoprim</b> | <b>25</b>         | 9                       | 11 | 80  | 18                          | 4  | 77  | 0                           | 25 | 75  | 0                       | 0 | 100 | 0                            | 0   | 100 | 0                           | 100 | 0   |
| <b>Ciprofloxacin</b>                 | <b>5</b>          | 3                       | 14 | 82  | 0                           | 4  | 96  | 0                           | 25 | 75  | 0                       | 0 | 100 | 0                            | 0   | 100 | 0                           | 100 | 0   |

?: was calculated according to the corresponding number (No.) of tested isolates.

**Table S3.** Antimicrobial susceptibility of different *Staphylococcus* spp. isolated from Sheep abscesses samples.

| Antimicrobial Disc            | Disc Content (µg) | <i>S. aureus</i> (n=7) |    |     | <i>S. schleiferi</i> (n=2) |    |     | <i>S. intermedius</i> (n=2) |   |     | <i>S. xylosus</i> (n=1) |   |     | <i>S. epidermidis</i> (n=1) |   |     |
|-------------------------------|-------------------|------------------------|----|-----|----------------------------|----|-----|-----------------------------|---|-----|-------------------------|---|-----|-----------------------------|---|-----|
|                               |                   | R                      | I  | S   | R                          | I  | S   | R                           | I | S   | R                       | I | S   | R                           | I | S   |
| Ampicillin                    | 10                | 100                    | 0  | 0   | 100                        | 0  | 0   | 100                         | 0 | 0   | 100                     | 0 | 0   | 100                         | 0 | 0   |
| Cefoxitin                     | 30                | 100                    | 0  | 0   | 100                        | 0  | 0   | 100                         | 0 | 0   | 100                     | 0 | 0   | 100                         | 0 | 0   |
| Vancomycin                    | 30                | 71                     | 0  | 29  | 50                         | 0  | 50  | 0                           | 0 | 100 | 100                     | 0 | 0   | 100                         | 0 | 0   |
| Imipenem                      | 10                | 0                      | 0  | 100 | 0                          | 0  | 100 | 0                           | 0 | 100 | 0                       | 0 | 100 | 0                           | 0 | 100 |
| Amoxicillin-clavulanic acid   | 5                 | 100                    | 0  | 0   | 100                        | 0  | 0   | 100                         | 0 | 0   | 100                     | 0 | 0   | 100                         | 0 | 0   |
| Kanamycin                     | 30                | 71                     | 0  | 29  | 100                        | 0  | 0   | 50                          | 0 | 50  | 010                     | 0 | 0   | 0                           | 0 | 100 |
| Clindamycin                   | 2                 | 100                    | 0  | 0   | 100                        | 0  | 0   | 100                         | 0 | 0   | 100                     | 0 | 0   | 100                         | 0 | 0   |
| azithromycin                  | 15                | 29                     | 29 | 42  | 0                          | 50 | 50  | 0                           | 0 | 100 | 0                       | 0 | 100 | 0                           | 0 | 100 |
| Cefuroxime                    | 30                | 86                     | 0  | 14  | 50                         | 0  | 50  | 100                         | 0 | 0   | 0                       | 0 | 100 | 0                           | 0 | 100 |
| Chloramphenicol               | 30                | 58                     | 0  | 42  | 50                         | 0  | 50  | 50                          | 0 | 50  | 0                       | 0 | 100 | 100                         | 0 | 0   |
| Sulfamethoxazole-trimethoprim | 25                | 0                      | 14 | 86  | 0                          | 0  | 100 | 0                           | 0 | 100 | 0                       | 0 | 100 | 0                           | 0 | 100 |
| Ciprofloxacin                 | 5                 | 0                      | 14 | 86  | 0                          | 0  | 100 | 0                           | 0 | 100 | 0                       | 0 | 100 | 0                           | 0 | 100 |

?: was calculated according to the corresponding number (No.) of tested isolates.

**Table S4.** Antimicrobial susceptibility of different *Staphylococcus* spp. isolated from human samples.

| Antimicrobial Disc            | Disc Content (µg) | <i>S. aureus</i> (n=24) |    |    | <i>S. schleiferi</i> (n=10) |    |     | <i>S. intermedius</i> (n=9) |    |    | <i>S. xylosus</i> (n=15) |    |    | <i>S. haemolyticus</i> (n=5) |    |     | <i>S. epidermidis</i> (n=1) |   |   | <i>S. aureularis</i> (n=2) |   |    |
|-------------------------------|-------------------|-------------------------|----|----|-----------------------------|----|-----|-----------------------------|----|----|--------------------------|----|----|------------------------------|----|-----|-----------------------------|---|---|----------------------------|---|----|
|                               |                   | R                       | I  | S  | R                           | I  | S   | R                           | I  | S  | R                        | I  | S  | R                            | I  | S   | R                           | I | S | R                          | I | S  |
| Ampicillin                    | 10                | 100                     | 0  | 0  | 100                         | 0  | 0   | 100                         | 0  | 0  | 100                      | 0  | 0  | 100                          | 0  | 0   | 100                         | 0 | 0 | 100                        | 0 | 0  |
| Cefoxitin                     | 30                | 100                     | 0  | 0  | 100                         | 0  | 0   | 100                         | 0  | 0  | 100                      | 0  | 0  | 100                          | 0  | 0   | 100                         | 0 | 0 | 100                        | 0 | 0  |
| Vancomycin                    | 30                | 54                      | 0  | 46 | 30                          | 0  | 70  | 44                          | 0  | 56 | 40                       | 0  | 60 | 60                           | 0  | 40  | 100                         | 0 | 0 | 100                        | 0 | 0  |
| Imipenem                      | 10                | 21                      | 8  | 71 | 0                           | 0  | 100 | 11                          | 33 | 56 | 13                       | 7  | 80 | 0                            | 0  | 100 | 100                         | 0 | 0 | 50                         | 0 | 50 |
| Amoxicillin-clavulanic acid   | 5                 | 100                     | 0  | 0  | 100                         | 0  | 0   | 100                         | 0  | 0  | 100                      | 0  | 0  | 100                          | 0  | 0   | 100                         | 0 | 0 | 100                        | 0 | 0  |
| Kanamycin                     | 30                | 83                      | 17 | 0  | 70                          | 20 | 10  | 78                          | 11 | 11 | 93                       | 0  | 7  | 80                           | 20 | 0   | 100                         | 0 | 0 | 100                        | 0 | 0  |
| Clindamycin                   | 2                 | 100                     | 0  | 0  | 90                          | 10 | 0   | 89                          | 0  | 11 | 93                       | 0  | 7  | 80                           | 0  | 20  | 100                         | 0 | 0 | 100                        | 0 | 0  |
| Azithromycin                  | 15                | 50                      | 33 | 17 | 60                          | 10 | 30  | 78                          | 11 | 11 | 67                       | 20 | 13 | 80                           | 0  | 20  | 100                         | 0 | 0 | 100                        | 0 | 0  |
| Cefuroxime                    | 30                | 92                      | 8  | 0  | 50                          | 30 | 20  | 67                          | 22 | 11 | 80                       | 13 | 7  | 80                           | 0  | 20  | 100                         | 0 | 0 | 50                         | 0 | 05 |
| Chloramphenicol               | 30                | 50                      | 17 | 33 | 50                          | 10 | 40  | 56                          | 11 | 33 | 40                       | 20 | 40 | 20                           | 20 | 60  | 100                         | 0 | 0 | 100                        | 0 | 0  |
| Sulfamethoxazole-trimethoprim | 25                | 62                      | 13 | 25 | 80                          | 10 | 10  | 67                          | 0  | 33 | 87                       | 0  | 13 | 60                           | 20 | 20  | 100                         | 0 | 0 | 100                        | 0 | 0  |
| Ciprofloxacin                 | 5                 | 54                      | 13 | 33 | 70                          | 20 | 10  | 67                          | 11 | 22 | 80                       | 0  | 20 | 40                           | 0  | 60  | 100                         | 0 | 0 | 100                        | 0 | 0  |

%; was calculated according to the corresponding number (No.) of tested isolates.

**Table S5.** Prevalence and distribution of resistance and virulence-associated genes in the examined *Staphylococcus* isolates.

| Species                | Source of Isolates | No. of Tested Isolate | Resistance Genes |      |             |      |              |      |             |      | Virulence Genes |      |             |      |             |      |            |      |            |   |            |   |
|------------------------|--------------------|-----------------------|------------------|------|-------------|------|--------------|------|-------------|------|-----------------|------|-------------|------|-------------|------|------------|------|------------|---|------------|---|
|                        |                    |                       | <i>mecA</i>      |      | <i>vanA</i> |      | <i>vanC1</i> |      | <i>ermC</i> |      | <i>hla</i>      |      | <i>icaA</i> |      | <i>icaD</i> |      | <i>sva</i> |      | <i>sea</i> |   | <i>sed</i> |   |
|                        |                    |                       | No.              | %    | No.         | %    | No.          | %    | No.         | %    | No.             | %    | No.         | %    | No.         | %    | No.        | %    | No.        | % | No.        | % |
| <i>S. aureus</i>       | Milk               | 19                    | 19               | 100  | 11          | 57.9 | 17           | 89.5 | 3           | 15.9 | 11              | 57.9 | 15          | 78.9 | 17          | 89.5 | 14         | 73.7 | 0          | 0 | 0          | 0 |
|                        | Sheep              | 4                     | 4                | 100  | 4           | 100  | 4            | 100  | 1           | 25   | 3               | 75   | 3           | 75   | 4           | 100  | 3          | 75   | 0          | 0 | 0          | 0 |
|                        | Human              | 11                    | 11               | 100  | 8           | 72.7 | 10           | 90.1 | 3           | 27.3 | 7               | 63.6 | 10          | 90.1 | 11          | 100  | 8          | 72.7 | 0          | 0 | 0          | 0 |
| <i>S. schleiferi</i>   | Milk               | 11                    | 10               | 90.9 | 4           | 36.4 | 8            | 72.7 | 0           | 0    | 3               | 27.3 | 8           | 72.7 | 7           | 63.6 |            |      |            |   |            |   |
|                        | Sheep              | 1                     | 0                | 0    | 0           | 0    | 1            | 100  | 0           | 0    | 0               | 0    | 1           | 100  | 1           | 100  |            |      |            |   |            |   |
|                        | Human              | 4                     | 3                | 75   | 0           | 0    | 3            | 75   | 0           | 0    | 2               | 50   | 3           | 75   | 3           | 75   |            |      |            |   |            |   |
| <i>S. intermedius</i>  | Milk               | 4                     | 3                | 75   | 2           | 66.7 | 2            | 50   | 0           | 0    | 2               | 50   | 2           | 50   | 1           | 25   |            |      |            |   |            |   |
|                        | Human              | 4                     | 3                | 75   | 0           | 0    | 3            | 75   | 0           | 0    | 2               | 50   | 3           | 75   | 2           | 50   |            |      |            |   |            |   |
| <i>S. xylosus</i>      | Milk               | 2                     | 2                | 100  | 1           | 50   | 0            | 0    | 1           | 50   | 0               | 0    | 2           | 100  | 2           | 100  |            |      |            |   |            |   |
|                        | Human              | 7                     | 7                | 100  | 0           | 0    | 6            | 85.7 | 0           | 0    | 3               | 42.9 | 3           | 42.9 | 3           | 42.9 |            |      |            |   |            |   |
| <i>S. haemolyticus</i> | Milk               | 1                     | 1                | 100  | 0           | 0    | 1            | 100  | 0           | 0    | 0               | 0    | 1           | 100  | 1           | 100  |            |      |            |   |            |   |
|                        | Human              | 3                     | 3                | 100  | 0           | 0    | 3            | 100  | 0           | 0    | 2               | 66.7 | 3           | 100  | 3           | 100  |            |      |            |   |            |   |
| <i>S. epidermidis</i>  | Human              | 1                     | 1                | 100  | 0           | 0    | 1            | 100  | 1           | 100  | 1               | 100  | 0           | 0    | 1           | 100  |            |      |            |   |            |   |
| Total                  | Milk               | 37                    | 35               | 94.6 | 18          | 48.6 | 29           | 78.4 | 4           | 10.8 | 16              | 43.2 | 28          | 75.7 | 28          | 75.7 |            |      |            |   |            |   |
|                        | Sheep              | 5                     | 4                | 80   | 4           | 80   | 5            | 100  | 1           | 20   | 3               | 60   | 4           | 80   | 5           | 100  |            |      |            |   |            |   |
|                        | Human              | 30                    | 28               | 93.3 | 8           | 26.7 | 26           | 86.7 | 4           | 13.3 | 17              | 56.7 | 22          | 73.3 | 23          | 76.7 |            |      |            |   |            |   |
| Overall total          |                    | 72                    | 67               | 93.1 | 30          | 41.7 | 60           | 83.3 | 9           | 12.5 | 36              | 50   | 54          | 75   | 56          | 77.8 |            |      |            |   |            |   |

%; was calculated according to the corresponding number (No.) of tested isolates.

Not investigated

**Table S6.** Primers sequences, target genes, amplicon sizes and cycling conditions for PCR and RT-PCR assays.

| Primers         | Primers Sequences                                      | Amplified Product | Primary Denaturation | Amplification (35 Cycles) |                 |                 | Final Extension | References |
|-----------------|--------------------------------------------------------|-------------------|----------------------|---------------------------|-----------------|-----------------|-----------------|------------|
|                 |                                                        |                   |                      | 2ry Denaturation          | Annealing       | Extension       |                 |            |
| <i>16S rRNA</i> | CCTATAAGACTGGGATAACTTCGGG<br>CTTTGAGTTTCAACCTTGCGGTCTG | 791 bp            | 94°C<br>5 min.       | 94°C<br>30 sec.           | 55°C<br>40 sec. | 72°C<br>45 sec. | 72°C<br>10 min. | [61]       |
| <i>mecA</i>     | GTAGAAATGACTGAACGTCCGATAA<br>CCAATTCCACATTGTTTCGGTCTAA | 310 bp            | 94°C<br>5 min.       | 94°C<br>30 sec.           | 50°C<br>30 sec. | 72°C<br>30 sec. | 72°C<br>7 min.  | [62]       |
| <i>vanA</i>     | CATGACGTATCGGTAAAATC<br>ACCGGGCAGRGTATTGAC             | 885 bp            | 94°C<br>5 min.       | 94°C<br>30 sec.           | 50°C<br>40 sec. | 72°C<br>45 sec. | 72°C<br>10 min. | [63]       |
| <i>vanC1</i>    | GGTATCAAGGAAACCTC<br>CTTCCGCCATCATAGCT                 | 822 bp            | 94°C<br>5 min.       | 94°C<br>30 sec.           | 54°C<br>40 sec. | 72°C<br>45 sec. | 72°C<br>10 min. | [64]       |
| <i>ermC</i>     | ATCTTTGAAATCGGCTCAGG<br>CAAACCCGTATTCCACGATT           | 299 bp            | 94°C<br>5 min.       | 94°C<br>30 sec.           | 51°C<br>30 sec. | 72°C<br>30 sec. | 72°C<br>7 min.  | [65]       |
| <i>hla</i>      | GAAGTCTGGTGAAAACCTGA<br>TGAATCCTGTCGCTAATGCC           | 704 bp            | 94°C<br>5 min.       | 94°C<br>30 sec.           | 53°C<br>40 sec. | 72°C<br>45 sec. | 72°C<br>10 min. | [66]       |
| <i>icaA</i>     | CCTAACTAACGAAAGGTAG<br>AAGATATAGCGATAAGTGC             | 1315 bp           | 94°C<br>5 min.       | 94°C<br>30 sec.           | 49°C<br>1 min.  | 72°C<br>1 min.  | 72°C<br>12 min. | [67]       |
| <i>icaD</i>     | AAACGTAAGAGAGGTGG<br>GGCAATATGATCAAGATA                | 381 bp            | 94°C<br>5 min.       | 94°C<br>30 sec.           | 49°C<br>30 sec. | 72°C<br>30 sec. | 72°C<br>7 min.  |            |
| <i>spa</i>      | TCAACAAAGAACAACAAAATGC<br>GCTTTCGGTGCTTGAGATT          | 226 bp            | 94°C<br>5 min.       | 94°C<br>30 sec.           | 55°C<br>30 sec. | 72°C<br>30 sec. | 72°C<br>7 min.  | [68]       |
| <i>sea</i>      | TTGGAAACGGTTAAAACGAA<br>GAACCTTCCCATCAAAAACA           | 120 bp            | 94°C<br>5 min.       | 94°C<br>30 sec.           | 50°C<br>30 sec. | 72°C<br>30 sec. | 72°C<br>7 min.  | [69]       |
| <i>sed</i>      | CCAATAATAGGAGAAAATAAAAAG<br>ATTGGTATTTTTTTTCGTTC       | 278 bp            | 94°C<br>5 min.       | 94°C<br>30 sec.           | 57°C<br>40 sec. | 72°C<br>45 sec. | 72°C<br>10 min. | [70]       |

**Table S7.** Cycling conditions of the different primers during RT-PCR.

| Target Gene     | Reverse Transcription | Primary Denaturation | Amplification (40 Cycles) |                       |               | Dissociation Curve (1 Cycle) |              |                    |
|-----------------|-----------------------|----------------------|---------------------------|-----------------------|---------------|------------------------------|--------------|--------------------|
|                 |                       |                      | Secondary Denaturation    | Annealing (Optics on) | Extension     | Secondary Denaturation       | Annealing    | Final Denaturation |
| 16S <i>rRNA</i> |                       |                      |                           | 55°C/ 30 sec.         |               |                              | 55°C/ 1 min. |                    |
| <i>mecA</i>     | 50°C/ 30 min.         | 94°C/ 15 min.        | 94°C/ 15 sec.             | 50°C/ 30 sec.         | 72°C/ 40 sec. | 94°C/ 1 min.                 | 50°C/ 1 min. | 94°C/ 1 min.       |
| <i>vanC1</i>    |                       |                      |                           | 54°C/ 30 sec.         |               |                              | 54°C/ 1 min. |                    |
